# Supplementary material for: Evaluation of kidney injury and metabolomic analysis in adulthood in a non-obese hyperglycemic mouse model after birth with low birthweight
Source: Research Square preprint supplement (doi:10.21203/rs.3.rs-5773108/v1), 2025-01-15
Supplement: Supplementary file 1 [file d990100c6815405cef2f1ccd.xlsx]

## Sheet: a. PC analysis
主成分得点
主成分	寄与率(%)	3	4	7	9	10	13
PC1	33.6576	-1.9438	12.4417	12.871	-10.8444	-4.71474	-7.80981
PC2	24.8174	2.06442	-6.23303	8.35347	4.30429	-14.7255	6.23632
PC3	17.1702	-0.487577	8.77031	-8.1265	-3.5236	-5.61609	8.98346
PC4	13.3434	12.7583	-0.0262899	-3.44925	-1.78143	-2.70776	-4.79361
PC5	11.0114	-2.35406	5.09295	-2.41221	9.26676	-3.65883	-5.93461

## Sheet: b. HeatMap
HCAによるクラスタリング結果							※Office2007以降を使用することで、HeatMapと同様の配色がご覧いただけます。
Line	ID	HMT DB †			m/z	MT/RT	Standardized Relative Area §
		Compound name	PubChem CID	HMDB ID			3	4	7	9	10	13
1	A_0054	XA0019			191.019	6.93239	1.81551	-0.52864	-0.407526	0.0629358	-1.10773	0.165449
2	C_0156	Ergothioneine	3037043	HMDB0003045	230.097	13.3648	2.04124	-0.408248	-0.408248	-0.408248	-0.408248	-0.408248
3	C_0095	Imidazolelactic acid	793		157.061	6.99314	2.04124	-0.408248	-0.408248	-0.408248	-0.408248	-0.408248
4	A_0086	N-Acetylglucosamine 6-phosphate	440996	HMDB0001062	300.049	7.56089	1.61775	-0.759195	-1.24477	-0.215933	0.180378	0.421766
5	C_0177	Glycerophosphocholine	439285	HMDB0000086	258.11	16.5167	1.33969	-0.638851	-1.4699	-0.178571	0.752758	0.194875
6	A_0040	Dihydroxyacetone phosphate	668	HMDB0001473	168.992	10.0439	1.5524	-0.635138	-0.635138	-0.635138	0.988151	-0.635138
7	A_0071	Ribose 5-phosphate	439167	HMDB0001548	229.012	8.55806	1.54958	0.00951849	-0.277136	-1.53849	0.375296	-0.118762
8	C_0123	Theobromine	5429	HMDB0002825	181.071	16.8527	1.368	0.785595	-1.22935	-0.997256	0.0748255	-0.00180747
9	C_0105	Pyridoxal	1050	HMDB0001545	168.066	6.95641	1.38966	0.922512	-1.27042	-0.470473	-0.616791	0.0455029
10	C_0173	γ-Glu-Thr	53861142	HMDB0029159	249.108	9.96612	0.96602	0.858911	-1.40606	-0.595172	-0.612668	0.788971
11	A_0121	UDP-N-acetylgalactosamine UDP-N-acetylglucosamine	23724461 445675	HMDB0000304 HMDB0000290	606.073	7.00491	1.05497	0.134796	-1.85054	0.0489252	-0.0510133	0.662863
12	A_0072	Ribose 1-phosphate Xylulose 5-phosphate	439236 439190	HMDB0001489 HMDB0000868	229.013	8.76081	0.49107	0.165157	-1.94064	0.453347	-0.039795	0.870858
13	A_0083	6-Phosphogluconic acid	91493	HMDB0001316	275.016	11.289	0.670436	0.356447	-1.81618	-0.0388244	-0.210669	1.03879
14	C_0172	Pyridoxamine 5'-phosphate	1053	HMDB0001555	249.064	8.25993	0.430871	0.288942	-1.93683	0.00564559	0.255128	0.956249
15	C_0044	Nicotinic acid	938	HMDB0001488	124.039	7.94122	0.190598	0.804809	-1.88467	0.0541349	-0.0364971	0.871622
16	A_0122	CMP-N-acetylneuraminate	448209	HMDB0001176	613.14	6.81605	0.239321	0.650931	-1.86163	0.387897	-0.313502	0.896987
17	C_0155	2'-Deoxyuridine	13712	HMDB0000012	229.081	16.8666	0.878546	0.361986	-1.27138	0.741653	-1.27138	0.560579
18	C_0064	Thiaproline	9934		134.027	10.9124	1.10532	0.423255	-0.790171	-0.112987	-1.48881	0.863387
19	C_0011	Sarcosine	1088	HMDB0000271	90.055	7.52962	1.38797	0.534044	-0.388843	-0.7318	-1.34422	0.542844
20	C_0055	Hydroxyproline	5810	HMDB0000725	132.066	9.44858	1.26635	-0.554002	-0.179287	-0.625688	-1.10727	1.1999
21	A_0077	Fructose 6-phosphate	603	HMDB0000124	259.022	8.13728	0.99431	0.0596996	-1.01319	-0.348591	-1.03194	1.33971
22	A_0079	Glucose 6-phosphate	5958	HMDB0001401	259.023	8.05363	0.897592	-0.021852	-1.00539	-0.472494	-0.877594	1.47974
23	C_0033	Betaine	247	HMDB0000043	118.086	8.86999	0.333297	0.194551	-0.960201	-0.327243	-0.949393	1.70899
24	A_0119	GTP	6830	HMDB0001273	521.983	9.14286	0.383949	-0.547155	-0.577964	-0.326098	-0.797398	1.86467
25	A_0117	ATP	5957	HMDB0000538	505.989	9.351	0.29605	-0.279629	-0.909093	-0.800785	-0.136266	1.82972
26	C_0153	Cystathionine	834	HMDB0000099	223.075	7.85134	0.0304876	0.616581	-1.29361	-0.51039	-0.425456	1.58239
27	C_0117	Serotonin	5202	HMDB0000259	177.102	6.94531	0.352691	0.934127	-1.107	-0.216208	-1.15017	1.18656
28	C_0143	γ-Glu-Gly	165527	HMDB0011667	205.082	9.45413	-0.64527	1.44192	-0.440355	-0.626774	-0.834595	1.10508
29	C_0110	XC0147	4173		172.071	7.4651	-0.621686	0.817884	-0.621686	-0.621686	-0.621686	1.66886
30	C_0188	Saccharopine	160556	HMDB0000279	277.14	8.47069	-1.05778	0.706049	-0.324606	-0.0820605	-0.842048	1.60045
31	A_0061	Gluconic acid	10690	HMDB0000625	195.051	6.84497	-1.37576	0.0196238	0.110424	0.0212927	-0.470535	1.69495
32	C_0119	Gluconolactone	7027	HMDB0000150	179.055	17.4415	-1.34031	0.213894	0.201269	-0.434548	-0.321174	1.68087
33	C_0120	Gulonolactone	439373	HMDB0003466	179.056	16.9838	-1.2768	0.256556	0.147469	-0.437881	-0.400974	1.71163
34	A_0084	Xanthosine	64959	HMDB0000299	283.068	6.39857	-0.615169	1.07938	0.284717	-0.483227	-1.37917	1.11347
35	C_0031	Guanidoacetic acid	763	HMDB0000128	118.061	6.54959	-0.864678	1.25777	0.43489	-0.5201	-1.19397	0.886084
36	C_0050	XC0016			129.066	6.94717	-0.54049	1.35903	0.572367	-0.279295	-1.51431	0.402702
37	C_0037	4-Amino-3-hydroxybutyric acid	2149		120.066	6.54774	-0.721639	1.0373	0.267078	0.822297	-1.61594	0.21091
38	A_0029	2-Hydroxyglutaric acid	43	HMDB0000606,HMDB0000694	147.03	12.6273	-0.424932	0.49591	0.145349	0.838737	-1.81056	0.755496
39	C_0054	trans-Glutaconic acid	5280498	HMDB0000620	131.034	17.4315	-0.576526	0.601466	0.767442	0.562792	-1.79157	0.436394
40	C_0176	XC0154	3182		255.108	16.8729	0.334189	0.765682	0.896821	0.11374	-1.84827	-0.262164
41	A_0124	NADP+	5886	HMDB0000217	742.068	7.68574	0.600697	0.0135286	0.486695	0.0533609	-1.94335	0.789072
42	A_0092	N-Glycolylneuraminic acid	440001	HMDB0000833	324.094	6.05818	0.393685	-0.0686754	0.310676	-0.296442	-1.68593	1.34668
43	A_0056	Citric acid	311	HMDB0000094	191.02	16.6882	0.554911	-0.55311	1.01418	-0.365455	-1.55254	0.902021
44	C_0138	Metanephrine	21100	HMDB0004063	198.112	7.44039	0.510088	-0.861894	1.4604	0.615199	-0.861894	-0.861894
45	A_0046	cis-Aconitic acid	643757	HMDB0000072	173.009	17.2406	0.0524293	-1.2253	0.955941	0.863815	-1.2253	0.578406
46	A_0044	Isovalerylalanine N-Acetylleucine	129285 70912	HMDB0000747 HMDB0011756	172.098	6.77802	-0.081309	-1.04415	0.867176	0.97413	-1.34433	0.628482
47	A_0020	6-Hydroxyhexanoic acid	14490		131.071	7.18628	0.0634074	-0.0136711	-0.058549	1.13886	-1.80132	0.671274
48	A_0043	Decanoic acid	2969	HMDB0000511	171.139	6.67015	-0.14147	-0.467894	-0.111974	1.6854	-1.33152	0.367461
49	C_0014	Glycerol	753	HMDB0000131	93.0546	16.8509	0.593331	-0.354665	0.132777	1.49996	-1.43749	-0.43391
50	C_0010	β-Ala	239	HMDB0000056	90.055	5.86348	-0.443435	1.1989	0.0332787	1.15128	-1.25074	-0.689274
51	C_0163	7,8-Dihydrobiopterin	119055	HMDB0000038	240.109	8.68328	0.198041	1.50858	-0.830473	0.784793	-0.830473	-0.830473
52	C_0052	N-Methylproline	557		130.086	9.73764	-0.611082	1.73155	-0.611082	0.712775	-0.611082	-0.611082
53	C_0079	γ-Butyrobetaine	134	HMDB0001161	146.118	6.44047	-0.808675	1.90801	-0.688783	0.170979	-0.418849	-0.162679
54	C_0170	γ-Glu-Val	7015683	HMDB0011172	247.129	9.94582	-1.20251	1.50708	-1.04761	0.239132	0.275123	0.228776
55	C_0194	γ-Glu-His	7017195	HMDB0029151	285.12	6.91573	-0.477477	1.35743	-1.56414	0.604023	0.279662	-0.1995
56	C_0039	Betaine aldehyde_+H2O	249	HMDB0001252	120.102	5.94115	-0.821049	0.824861	-1.58823	0.191949	0.937762	0.454709
57	C_0151	N-Acetylglucosylamine	439454	HMDB0001104	221.113	7.81806	-0.566284	0.628987	-1.72978	0.0631372	0.826974	0.776969
58	C_0168	Uridine	6029	HMDB0000296	245.077	16.8859	-0.367386	0.544121	-1.82557	0.139444	0.951763	0.55763
59	A_0060	Galacturonic acid-2 Glucuronic acid-2	439215 94715	HMDB0002545 HMDB0000127	193.036	6.90082	-0.449466	0.382738	-1.83635	0.415881	0.759222	0.727973
60	A_0087	N-Acetylglucosamine 1-phosphate	440272	HMDB0001367	300.049	7.84726	-0.400887	0.00436965	-1.75714	0.359259	0.976953	0.817446
61	A_0118	Taurocholic acid	46783527	HMDB0000036	514.284	5.71399	-1.073	-0.0820193	-1.22403	0.778756	0.322266	1.27803
62	A_0059	Galacturonic acid-1 Glucuronic acid-1	439215 94715	HMDB0002545 HMDB0000127	193.035	6.77057	-1.29584	0.311477	-1.02059	0.717865	-0.00396678	1.29106
63	C_0166	Thymidine	5789	HMDB0000273	243.097	16.8748	-1.44933	0.550484	-1.0226	1.04606	0.246239	0.629147
64	A_0075	γ-Glu-Taurine	68759	HMDB0004195	253.05	6.75756	-1.36083	0.773797	-1.02728	0.0482199	0.418749	1.14734
65	C_0013	Dimethylaminoethanol	7902	HMDB0032231	90.0914	5.53981	-1.94341	0.71015	-0.156899	0.355489	0.389708	0.644963
66	A_0047	N-Acetylasparagine	99715	HMDB0006028	173.057	6.98774	-1.96997	0.532393	0.766666	-0.031788	0.357736	0.344966
67	C_0045	Taurine	1123	HMDB0000251	126.022	16.8398	-1.67422	0.962554	-0.259294	-0.331009	1.00177	0.300204
68	C_0041	Cys	594	HMDB0000574,HMDB0003417	122.027	8.91437	-1.52135	0.583362	-0.656256	0.145518	1.37396	0.0747664
69	C_0179	γ-Glu-Asn	131801686	HMDB0029144	262.105	9.97721	-0.600111	1.16402	-0.933965	-0.665146	1.36447	-0.329274
70	C_0180	γ-Glu-Ornitine	189156	HMDB0002248	262.14	6.75485	-0.532697	1.38707	-0.870458	-0.817623	1.13048	-0.296774
71	C_0122	Glucosamine	439213	HMDB0001514	180.087	7.33732	-0.945948	1.43704	-0.576172	-0.66801	1.07594	-0.322853
72	C_0020	Choline	305	HMDB0000097	105.11	5.46953	-0.849819	1.18177	-0.578909	-1.15433	1.04109	0.360202
73	C_0043	Nicotinamide	936	HMDB0001406	123.055	5.92821	-0.643968	1.38835	-0.376915	-1.39504	0.658059	0.369514
74	C_0066	Adenine	190	HMDB0000034	136.062	6.08356	-0.369149	1.25704	-0.654396	-1.43325	0.801648	0.398114
75	C_0174	γ-Glu-Cys	123938	HMDB0001049	251.07	10.029	-0.421917	0.858276	-0.883384	-1.20595	0.334292	1.31868
76	C_0001	Trimethylamine	1146	HMDB0000906	60.0808	4.73706	-0.42435	1.22406	-1.28081	-0.842098	0.441875	0.881332
77	C_0213	S-Adenosylhomocysteine	439155	HMDB0000939	385.129	6.94346	0.068609	1.40561	-1.46221	-0.748594	0.210466	0.526125
78	C_0208	XC0132			325.161	6.88614	0.527494	0.309048	-1.332	-1.19381	0.848301	0.840965
79	C_0167	Cytidine	6175	HMDB0000089	244.098	7.64425	0.890746	-0.159735	-1.4169	-0.922083	0.680655	0.927318
80	C_0125	Phosphorylcholine	1014	HMDB0001565	184.074	15.6359	0.691659	-0.11166	-1.48869	-0.802636	0.552014	1.15931
81	A_0074	XA0033			242.08	6.39858	0.507955	-0.648683	-1.4399	-0.399784	0.738161	1.24225
82	C_0171	Malonylcarnitine	22833583	HMDB0002095	248.113	8.03993	0.735015	-0.774078	-1.44573	-0.235543	0.517282	1.20306
83	A_0024	Ethanolamine phosphate	1015	HMDB0000224	140.012	6.69804	0.168802	-0.872439	-1.45765	0.137315	0.915728	1.10824
84	A_0085	Sedoheptulose 7-phosphate	165007	HMDB0001068	289.033	7.89002	0.0957324	-1.13371	-0.93713	-0.187244	0.604521	1.55783
85	A_0031	3-Phenylpropionic acid	107	HMDB0000764	149.06	7.31174	-0.448717	-0.609828	-0.793187	-0.465557	0.489332	1.82796
86	C_0209	NMN	14180	HMDB0000229	335.065	15.7228	0.210354	-0.923473	-0.131985	-1.2937	0.819793	1.31901
87	A_0007	2-Hydroxyisobutyric acid	11671	HMDB0000729	103.04	8.11499	-0.0132006	-0.579069	-0.517112	-1.24227	0.965213	1.38644
88	C_0022	Diethanolamine	8113	HMDB0004437	106.086	6.09095	-0.806453	0.216329	-0.787127	-0.966765	1.19871	1.1453
89	C_0089	Guanine	764	HMDB0000132	152.058	6.61985	-0.50042	-0.239063	-1.05017	-0.642143	1.54786	0.883942
90	A_0081	myo-Inositol 2-phosphate	160886		259.023	8.55182	-0.167814	-0.55855	-0.959453	-0.75065	1.54045	0.896014
91	C_0058	Creatine	586	HMDB0000064	132.077	7.01559	-0.39963	-0.675795	-0.608785	-0.694971	1.78109	0.598092
92	C_0192	Guanosine	6802	HMDB0000133	284.099	9.93471	-0.536224	-0.49644	-1.22354	-0.0336663	1.56092	0.728941
93	A_0102	FAD_divalent	643975	HMDB0001248	391.57	6.57716	-0.892004	-0.280887	-1.13361	0.00402528	1.45917	0.843305
94	C_0184	Inosine	6021	HMDB0000195	269.088	15.0635	-0.94872	-0.1514	-1.21743	0.0774153	1.31977	0.920374
95	A_0090	CMP	6131	HMDB0000095	322.044	7.85841	-0.269282	-0.572569	-1.50175	0.388605	1.35326	0.601739
96	A_0042	Glycerol 3-phosphate	439162	HMDB0000126	171.006	9.65388	0.465631	-0.829039	-1.15956	-0.267885	1.6289	0.161956
97	A_0041	Glycerol 2-phosphate	2526		171.006	10.0273	0.0912035	-0.637621	-1.13138	-0.0888721	1.81517	-0.0484963
98	A_0120	UDP-galactose UDP-glucose	23724458 8629	HMDB0000302 HMDB0000286	565.049	7.14624	0.0916102	-0.253606	-1.16685	0.228293	1.7561	-0.655554
99	C_0107	Tyr-Arg_divalent	123804		169.594	6.13164	-0.605772	-0.360015	-0.0118459	-0.0545192	1.92456	-0.892406
100	C_0211	Decarboxylated S-Adenosylmethionine	439415	HMDB0000988	355.153	4.52618	-0.720493	-0.139683	-0.333462	-0.207298	1.99002	-0.589086
101	C_0042	2-Phenylethylamine	1001	HMDB0012275	122.097	6.15655	-0.408248	-0.408248	-0.408248	-0.408248	2.04124	-0.408248
102	C_0159	XC0071			234.181	4.97567	-0.505227	-0.0188476	-0.150317	-0.678073	1.96995	-0.617489
103	A_0030	Citramalic acid	1081	HMDB0000426	147.03	12.8665	-0.921076	-0.0501043	0.0820785	-0.921076	1.81493	-0.0047517
104	C_0097	Tryptamine	1150	HMDB0000303	161.106	6.587	-0.875955	-0.875955	0.640001	-0.875955	1.38935	0.598514
105	A_0052	XA0017			186.113	6.58086	-1.24472	-1.2063	0.351331	0.332733	1.19995	0.567004
106	C_0071	Tyramine	5610	HMDB0000306	138.092	6.58158	-0.242601	-1.57667	0.696702	-0.32227	1.36359	0.0812482
107	A_0013	Hexanoic acid	8892	HMDB0000535	115.076	7.40507	-0.0756977	-1.67227	1.37149	-0.114619	0.548085	-0.0569879
108	A_0032	Pelargonic acid	8158	HMDB0000847	157.123	6.80926	0.0621152	-1.91671	0.80405	0.0759129	0.799704	0.174923
109	A_0099	GMP	6804	HMDB0001397	362.051	7.52002	0.140199	-1.54023	-0.0330505	0.891884	1.18303	-0.641833
110	A_0109	GDP	8977	HMDB0001201	442.015	8.57189	0.308045	-1.2574	0.650705	1.01144	0.544599	-1.2574
111	A_0027	4-Acetamidobutanoic acid	18189	HMDB0003681	144.066	7.14811	-0.690952	-1.28569	0.321749	1.5587	0.455459	-0.359267
112	C_0083	2-Methylthiazolidine-4-carboxylic acid	160736		148.043	11.0916	-0.76659	-0.611312	-0.745337	1.46762	1.07423	-0.41861
113	C_0133	N6,N6,N6-Trimethyllysine	440120	HMDB0001325	189.16	5.72846	-1.02041	-0.74006	-0.491532	0.858438	1.55163	-0.158066
114	A_0036	XA0012			166.018	7.73383	-0.76721	-0.884948	-0.0344997	0.762063	1.60661	-0.682012
115	C_0128	N8-Acetylspermidine	123689	HMDB0002189	188.177	5.12366	-0.288818	-0.708114	-0.571446	0.894324	1.57429	-0.900232
116	C_0127	N1-Acetylspermidine	496	HMDB0001276	188.176	5.05891	-0.159633	-0.686291	-0.320615	0.641394	1.65028	-1.12513
117	A_0096	AMP	6083	HMDB0000045	346.055	7.62413	-0.317429	-0.349542	-0.197789	1.24578	1.05717	-1.43818
118	C_0199	5'-Deoxy-5'-methylthioadenosine	439176	HMDB0001173	298.096	7.94761	0.202254	-0.851004	-0.851004	1.28364	1.06711	-0.851004
119	A_0033	3-Hydroxy-3-methylglutaric acid	1662	HMDB0000355	161.046	11.8243	0.303637	-1.16025	-1.16025	1.42921	0.302201	0.285446
120	C_0215	5-Methyltetrahydrofolic acid	444412	HMDB0001396	460.194	9.29702	0.975853	-1.42353	-0.970414	0.639193	0.818203	-0.0393045
121	A_0100	CoA_divalent	87642	HMDB0001423	382.548	8.58715	0.417118	-1.58179	-0.889844	0.438511	0.677408	0.938596
122	A_0070	Ribulose 5-phosphate	439184	HMDB0000618	229.012	8.86964	-0.357486	-0.968314	-1.23979	0.818839	0.556028	1.19072
123	C_0214	S-Adenosylmethionine	34755	HMDB0001185	399.145	5.6989	-0.540951	-1.10229	-0.987014	0.797922	1.23454	0.597796
124	A_0048	Ascorbic acid	54670067	HMDB0000044	175.025	7.05512	-1.04231	-1.13136	-0.432731	0.565538	1.16867	0.872195
125	C_0035	Homoserine	12647	HMDB0000719	120.065	7.97333	-1.14354	-1.14354	0.428407	0.36407	0.0574945	1.4371
126	A_0069	Myristic acid	11005	HMDB0000806	227.202	6.27954	-1.01966	-0.527999	-0.67903	0.369498	0.104187	1.75301
127	A_0068	Myristoleic acid	5281119	HMDB0002000	225.185	6.30929	-0.787877	-0.549215	-0.532786	0.898034	-0.635472	1.60732
128	A_0063	Lauric acid	3893	HMDB0000638	199.17	6.44136	-0.76653	-0.757324	-0.8074	0.972952	-0.132598	1.4909
129	A_0014	N-Acetylglycine	10972	HMDB0000532	116.035	7.84727	-0.188282	-1.40489	-0.572823	1.26542	-0.12238	1.02296
130	C_0019	N,N-Dimethylglycine	673	HMDB0000092	104.071	8.63152	0.428701	-1.44938	-0.0165829	1.12125	-0.894786	0.810803
131	C_0148	β-Ala-Lys	440638		218.151	5.36951	1.37899	-0.644449	-0.644449	1.19881	-0.644449	-0.644449
132	A_0098	IMP	8582	HMDB0000175	347.041	7.79708	0.811563	-0.63573	-0.848862	1.49449	0.157491	-0.978952
133	A_0004	Butyric acid Isobutyric acid	264 6590	HMDB0000039 HMDB0001873	87.0447	8.10009	0.785661	-0.170828	0.0141009	1.36397	-0.492907	-1.5
134	A_0025	N-Ethylmaleimide_+H2O	4362		142.051	7.23585	-0.408248	-0.408248	-0.408248	2.04124	-0.408248	-0.408248
135	A_0008	3-Hydroxybutyric acid	441	HMDB0000011,HMDB0000357,HMDB0000442	103.04	7.85469	-0.5527	-0.590783	-0.519432	1.97062	0.115402	-0.423109
136	C_0017	2-Aminoisobutyric acid 2-Aminobutyric acid	6119 6657	HMDB0001906 HMDB0000452	104.071	7.61837	-0.71791	-0.180782	-0.531739	1.95276	-0.592431	0.0700973
137	C_0015	3-Aminobutyric acid	10932		104.071	6.32701	-0.491477	-0.616973	-0.955021	1.79934	-0.178752	0.442882
138	C_0109	1-Methylhistidine 3-Methylhistidine	92105 64969	HMDB0000001 HMDB0000479	170.092	5.98369	-0.390889	0.518681	-1.35566	1.51432	-0.593875	0.307417
139	A_0026	Octanoic acid	379	HMDB0000482	143.107	6.97668	0.135901	-0.269419	-1.88158	0.706992	0.735295	0.572809
140	A_0078	Glucose 1-phosphate	65533	HMDB0001586	259.022	8.26927	0.350507	-0.335314	-1.85188	0.612215	0.936886	0.287581
141	A_0110	XA0065			445.052	5.86842	0.449897	-0.567321	-1.77932	0.884378	0.593295	0.419075
142	C_0210	Thiamine phosphate	1131	HMDB0002666	345.079	8.40598	0.939311	0.0780784	-1.81998	0.878677	0.0722067	-0.148295
143	C_0197	Aspartame	134601	HMDB0001894	295.129	8.56197	0.862971	0.373302	-1.73129	0.778538	0.344166	-0.627688
144	C_0090	γ-Glu-Arg_divalent	20719180	HMDB0029143	152.585	6.91204	0.835141	-0.123745	-1.73017	0.410664	0.989687	-0.381574
145	C_0183	Adenosine	60961	HMDB0000050	268.104	7.79772	0.120608	0.374571	-1.71032	0.548402	1.16911	-0.502371
146	A_0088	N-Acetylneuraminic acid	439197	HMDB0000230	308.099	6.07305	-0.0708039	0.728453	-1.10176	1.11418	0.609577	-1.27965
147	A_0108	ADP	6022	HMDB0001341	426.022	8.76741	-0.55245	0.549304	-0.908187	0.794738	1.26864	-1.15204
148	C_0118	Cys-Gly	439498	HMDB0000078	179.048	7.28741	-1.08435	0.179579	0.463005	0.762268	1.05325	-1.37375
149	C_0085	N-Acetylserine	65249	HMDB0002931	148.062	17.5781	-1.24272	0.952074	0.665476	0.129479	0.738404	-1.24272
150	A_0065	Mucic acid	3037582	HMDB0000639	209.03	10.9265	-1.25959	0.558377	0.57432	-0.539276	1.39589	-0.729713
151	A_0034	Terephthalic acid	7489	HMDB0002428	165.02	12.3396	-1.21822	0.45934	0.988998	-1.11013	1.03466	-0.154643
152	A_0022	Threonic acid	5460407	HMDB0000943	135.03	7.63341	-0.737404	-0.633739	1.72213	-0.513177	0.718429	-0.556234
153	C_0057	3-Guanidinopropionic acid	67701		132.076	6.37102	-0.641628	-0.641628	1.45613	-0.641628	1.11038	-0.641628
154	C_0131	N-Acetyllysine	92907	HMDB0000446	189.124	7.70897	0.435171	-0.578801	1.02361	-0.96445	1.15895	-1.07448
155	C_0108	Noradrenaline 6-Hydroxydopamine	439260 4624	HMDB0000216 HMDB0001537	170.081	7.13948	1.37329	-1.11785	0.564791	-0.69029	0.663228	-0.793173
156	C_0084	threo-β-Methylaspartic acid	440064		148.06	9.68887	1.2347	-0.396338	0.438077	-1.19057	0.880477	-0.966346
157	A_0097	3'-AMP	41211	HMDB0003540	346.057	7.98203	0.700827	-0.609772	-0.609772	-0.609772	1.73826	-0.609772
158	A_0019	N-Acetylalanine N-Acetyl-β-alanine	88064 76406	HMDB0000766	130.051	7.35452	0.384272	-0.3647	-0.222235	-0.408461	1.77464	-1.16351
159	C_0096	XC0145 Ala-Ala	15331 5460362	HMDB0003459	161.093	7.31884	0.225166	-0.111797	-0.0394233	-0.339726	1.67958	-1.4138
160	C_0114	Arg	6322	HMDB0000517,HMDB0003416	175.119	5.68408	0.432889	0.0457748	-0.331774	-0.581072	1.678	-1.24382
161	C_0113	N-Acetylornithine	439232	HMDB0003357	175.108	7.52407	0.22111	0.11688	-0.324815	-0.532234	1.74512	-1.22606
162	C_0130	Gly-Leu			189.123	7.62758	-0.178551	0.481643	-0.662284	-0.265262	1.73212	-1.10766
163	C_0094	His	773	HMDB0000177	156.077	5.83943	-0.114202	0.980287	-0.704961	-0.385954	1.40756	-1.18273
164	C_0081	Gln	738	HMDB0000641,HMDB0003423	147.077	8.49473	-0.196452	0.913567	-0.402264	-0.662502	1.49019	-1.14254
165	C_0087	Met	876	HMDB0000696	150.058	8.46698	-0.0426297	0.648439	-0.280439	-0.852466	1.61141	-1.08431
166	C_0202	Arg-Glu			304.162	5.97259	-0.0950756	0.638022	-0.380454	-0.522053	1.61191	-1.25234
167	C_0103	Phe	994	HMDB0000159	166.087	8.71656	0.0674204	0.575035	-0.482364	-0.648167	1.63919	-1.15111
168	C_0062	Asn	236	HMDB0000168,HMDB0033780	133.061	8.31725	0.238419	0.617421	-0.761342	-0.726069	1.59166	-0.960084
169	C_0160	Thr-Asp	3280446		235.091	8.34865	0.469119	0.393513	-0.717013	-0.613616	1.58028	-1.11228
170	C_0193	His-Glu	7010583		285.12	6.02068	0.229988	0.47444	-0.866641	-0.318726	1.61045	-1.12951
171	A_0091	UMP	6030	HMDB0000288	323.028	7.99042	0.208266	0.463707	-0.969438	0.136097	1.45368	-1.29231
172	C_0207	Tyr-Glu			311.124	8.75171	0.517271	0.610114	-0.537408	-0.592772	1.36522	-1.36242
173	C_0187	Glu-Glu	439500		277.104	8.57606	0.905795	0.69768	-0.717663	-0.612275	1.03912	-1.31266
174	C_0162	Ser-Glu			235.093	8.18783	0.593782	0.993625	-0.653785	-0.565135	1.00853	-1.37702
175	A_0009	2-Hydroxybutyric acid	440864	HMDB0000008	103.04	8.03816	0.646948	0.973019	-0.903207	-0.903207	1.08965	-0.903207
176	C_0161	γ-Glu-Ser	22844748	HMDB0029158	235.093	9.87555	0.477419	0.701417	-0.168533	-1.4776	1.2234	-0.756104
177	C_0028	β-Cyanoalanine	439742		115.05	11.0842	0.0593293	0.739845	0.450281	-1.4258	1.13648	-0.960137
178	C_0009	Putrescine	1045	HMDB0001414	89.1074	3.80655	-0.21104	1.01783	0.652719	-1.05769	0.870075	-1.27189
179	C_0178	γ-Glu-Ile γ-Glu-Leu	22885096 151023	HMDB0011170 HMDB0011171	261.145	10.0863	-0.243338	1.62075	-0.177596	-0.918979	0.695787	-0.97662
180	C_0030	Pro	614	HMDB0000162,HMDB0003411	116.071	8.51505	-0.0775064	1.45851	-0.189296	-1.08668	0.854268	-0.959295
181	C_0104	Taurocyamine	68340	HMDB0003584	168.045	16.8508	-0.152114	1.4338	-0.490598	-1.15103	0.983323	-0.623385
182	C_0021	Ser	617	HMDB0000187,HMDB0003406	106.05	7.93084	0.0391685	1.17781	-0.311694	-1.22106	1.15117	-0.835403
183	C_0036	Thr	6288	HMDB0000167	120.066	8.31725	0.206574	1.11812	-0.466225	-1.10112	1.18148	-0.938831
184	C_0060	Ile	791	HMDB0000172	132.102	8.03438	-0.152071	0.991075	-0.248735	-0.953662	1.39769	-1.0343
185	C_0059	Leu	857	HMDB0000687	132.102	8.12128	-0.208314	0.944902	-0.186713	-0.837334	1.42561	-1.13816
186	C_0144	Trp	1148	HMDB0000929	205.097	8.66665	-0.236406	1.05098	-0.0822233	-0.891782	1.30951	-1.15008
187	C_0034	Val	1182	HMDB0000883	118.086	7.89016	-0.181336	1.13176	-0.112043	-0.968882	1.23282	-1.10232
188	C_0061	Gly-Gly	11163	HMDB0011733	133.061	6.6291	0.34247	1.22671	0.0345023	-0.801349	0.697169	-1.4995
189	C_0082	Lys	866	HMDB0000182,HMDB0003405	147.113	5.49542	0.0984956	1.25335	-0.0271082	-0.963935	0.920602	-1.2814
190	C_0124	Tyr	1153	HMDB0000158	182.081	8.91991	0.159398	1.04241	0.0824264	-1.00723	1.05068	-1.32768
191	C_0140	ADMA	123831	HMDB0001539	203.15	6.09835	0.000923976	1.18446	0.0347476	-0.689067	0.955132	-1.48619
192	C_0007	Cysteamine	6058	HMDB0002991	78.0375	5.13946	-0.468679	1.10257	0.0470968	0.131538	0.861616	-1.67415
193	C_0136	2,6-Diaminopimelic acid	439283	HMDB0001370	191.103	7.05071	-0.27892	1.62661	-0.475072	-0.269039	0.645874	-1.24945
194	C_0152	N-Acetylgalactosamine N-Acetylglucosamine N-Acetylmannosamine	35717 439174 439281	HMDB0000853 HMDB0000215 HMDB0001129	222.097	16.8638	0.118804	1.47317	0.0483141	-0.440378	0.374599	-1.57451
195	C_0185	γ-Glu-Gln	150914	HMDB0011738	276.12	10.1768	0.747821	1.3511	-0.228591	-0.93512	0.323374	-1.25858
196	C_0141	Spermine	1103	HMDB0001256	203.223	3.616	0.458127	1.51085	0.0196542	-1.46444	0.0733799	-0.597574
197	C_0191	1-Methyladenosine	27476	HMDB0003331	282.12	7.85134	-0.547953	1.57497	0.724699	-1.25281	-0.255093	-0.243812
198	C_0115	Guanidinosuccinic acid	439918	HMDB0003157	176.066	7.98816	-0.71909	1.65882	0.675656	-0.928409	-0.0461781	-0.640802
199	C_0182	Thiamine	1130	HMDB0000235	265.112	5.25127	-0.393108	1.68172	0.676561	-0.899398	-0.230638	-0.835134
200	C_0018	GABA	119	HMDB0000112	104.071	6.13163	-0.15134	1.58149	0.813469	-0.948681	-0.45277	-0.84217
201	C_0101	5-Hydroxylysine	3032849	HMDB0000450	163.108	5.70812	-0.100285	1.58965	0.773931	-0.852724	-0.438852	-0.971723
202	C_0116	Citrulline	9750	HMDB0000904	176.103	8.71102	-0.203474	1.28309	1.04969	-0.942873	-0.0375233	-1.14891
203	A_0067	Pantothenic acid	6613	HMDB0000210	218.104	6.4395	-0.310584	0.988888	1.46234	-0.94072	-0.298005	-0.901915
204	C_0158	Isobutyrylcarnitine	168379	HMDB0000736	232.155	7.49449	-0.208614	1.02049	1.46011	-0.955736	-0.699919	-0.616326
205	A_0010	Glyceric acid	439194	HMDB0000139,HMDB0006372	105.019	8.444	-0.194822	1.00294	1.46706	-0.979762	-0.697285	-0.598129
206	C_0068	1-Methylnicotinamide	457	HMDB0000699	137.071	5.87827	-0.24407	1.11492	1.35713	-0.990618	-0.851829	-0.385535
207	C_0027	Creatinine	588	HMDB0000562	114.066	5.82833	-0.43956	1.0324	1.43291	-0.822271	-0.980816	-0.22266
208	C_0077	Stachydrine	115244	HMDB0004827	144.102	9.00494	0.0942484	0.801756	1.3678	-1.11639	-1.10887	-0.0385421
209	C_0024	Cytosine	597	HMDB0000630	112.05	5.80044	-0.106446	1.20812	1.08197	-1.08589	-1.08589	-0.0118565
210	A_0058	Phenaceturic acid	68144	HMDB0000821	192.066	6.85613	-0.65232	1.32415	1.19083	-0.812025	-0.834939	-0.215694
211	C_0201	γ-Glu-Val-Gly			304.149	10.2495	-0.778601	1.28307	1.2267	-0.778601	-0.778601	-0.17397
212	A_0045	XA0013			172.992	8.75068	-0.533823	1.50433	1.0023	-0.638544	-0.940585	-0.393678
213	C_0032	5-Aminovaleric acid	138	HMDB0003355	118.086	6.36015	-0.644389	1.3814	1.19615	-0.644389	-0.644389	-0.644389
214	C_0093	4-(β-Acetylaminoethyl)imidazole	69602		154.097	6.68643	-0.305858	1.55996	0.935407	-0.729837	-0.729837	-0.729837
215	C_0008	Piperidine	8082		86.0963	5.54678	-0.77044	1.66415	0.670318	-0.0231506	-0.77044	-0.77044
216	A_0053	Azelaic acid	2266	HMDB0000784	187.097	9.71443	-0.815409	1.63614	0.416072	0.39401	-0.815409	-0.815409
217	C_0047	3-Hydroxy-2-methyl-4-pyrone	8369	HMDB0030776	127.038	16.8895	-0.369825	1.57336	0.592134	0.00675468	-0.446932	-1.35549
218	C_0016	3-Aminoisobutyric acid	64956	HMDB0003911	104.071	6.24445	0.100723	1.83875	0.119923	-0.339317	-0.857805	-0.862272
219	C_0146	Kynurenine	846	HMDB0000684	209.092	7.92907	-0.158299	1.75898	0.372737	-0.518129	-0.272341	-1.18295
220	C_0106	Pyridoxamine	1052	HMDB0001431	169.097	4.77221	-0.394966	1.92124	0.152326	-0.398509	-0.364825	-0.915269
221	C_0063	Ornithine	389	HMDB0000214,HMDB0003374	133.097	5.45103	-0.653426	1.89495	0.287432	-0.600112	-0.231939	-0.6969
222	C_0198	XC0120			298.052	7.43347	-0.832707	1.75095	0.0510978	-0.370252	0.379293	-0.978378
223	C_0196	γ-Glu-Phe	111299	HMDB0000594	295.129	10.1897	-0.595238	1.54597	0.0149543	-0.839239	0.815171	-0.941613
224	C_0056	cis-4-Hydroxyproline	440014	HMDB0006055	132.066	8.68698	-0.854055	1.2911	0.0230262	-0.7155	1.14225	-0.886819
225	A_0023	p-Toluic acid o-Toluic acid m-Toluic acid	7470 8373 7418		135.045	7.5702	-1.08896	1.20046	0.46242	-1.05276	0.923632	-0.444796
226	C_0091	Xanthine	1188	HMDB0000292	153.041	15.0912	-0.768371	1.08715	0.761611	-1.48825	0.622013	-0.214153
227	C_0003	Ethanolamine	700	HMDB0000149	62.06	5.08296	-0.808959	1.44219	0.604847	-1.22029	0.444194	-0.461977
228	C_0132	Nω-Methylarginine	132862		189.135	5.9393	-0.588243	1.33556	0.768115	-1.01108	0.499746	-1.0041
229	C_0026	Uracil	1174	HMDB0000300	113.035	16.8526	-0.37284	1.41979	0.710583	-1.23051	0.32267	-0.849697
230	C_0139	SDMA	169148	HMDB0003334	203.15	6.19452	-0.356861	1.65563	0.120263	-1.29058	0.40653	-0.534984
231	C_0212	Riboflavin	493570	HMDB0000244	377.146	16.7586	-0.334939	1.73155	0.154773	-1.25418	0.203851	-0.501057
232	C_0086	Glu	611	HMDB0000148,HMDB0003339	149.064	8.63152	-0.514424	1.80477	0.215629	-1.1024	0.0579619	-0.461537
233	C_0051	4-Oxopyrrolidine-2-carboxylic acid	107541		130.05	8.63337	-0.766299	1.81102	0.105398	-1.02341	0.118996	-0.245699
234	C_0129	N6-Acetyllysine	92832	HMDB0000206	189.123	8.98831	-0.589644	1.7635	-0.235991	-1.17204	0.32395	-0.08978
235	C_0135	Gly-Asp	97363		191.066	7.80511	-0.613952	1.55997	0.0295347	-1.4374	0.320199	0.141649
236	C_0067	Hypoxanthine	790	HMDB0000157	137.046	8.95873	-1.02785	1.52483	0.367209	-1.1911	0.239014	0.0878972
237	C_0145	Carboxymethyllysine	123800		205.119	7.31884	-0.537249	1.35771	0.455445	-1.55157	-0.190208	0.465871
238	C_0012	Ala	602	HMDB0000161,HMDB0001310	90.0551	7.16536	-0.166932	1.6509	-0.0587083	-1.47985	-0.13363	0.188221
239	C_0005	Gly	750	HMDB0000123	76.0394	6.63465	-0.571633	1.78549	-0.378074	-1.04191	-0.240095	0.446223
240	C_0088	Triethanolamine	7618		150.112	6.54474	-0.378193	2.0354	-0.301619	-0.493912	-0.493912	-0.367762
241	C_0100	Carnitine	85	HMDB0000062	162.113	6.753	-0.23766	1.97278	-0.197174	-0.868447	-0.203522	-0.465982
242	C_0038	2-Methylserine	439656		120.066	8.20076	-0.518235	1.93842	-0.582236	-0.549349	0.237499	-0.526097
243	C_0072	γ-Glu-Lys_divalent	65254	HMDB0029154	138.581	6.80847	-0.941929	1.85645	-0.278162	-0.717502	0.228831	-0.14769
244	A_0018	5-Oxoproline	7405	HMDB0000267	128.035	7.80635	-1.46472	1.61849	-0.0660643	-0.161354	-0.280952	0.354607
245	C_0205	XC0126			310.113	11.6441	-1.42783	1.57786	0.334893	-0.53217	-0.170264	0.217513
246	C_0190	N-(1-Deoxy-1-fructosyl)valine	131752247	HMDB0037844	280.139	10.8902	-1.25166	1.51414	0.841639	-0.275876	-0.495601	-0.332647
247	C_0200	N1-Methylguanosine	96373	HMDB0001563	298.114	9.46521	-1.47734	0.94412	1.16008	0.161556	-0.0453424	-0.743077
248	C_0099	O-Acetylhomoserine 2-Aminoadipic acid	439389 92136	HMDB0000510	162.076	8.63522	-0.361575	0.716106	1.35261	-0.18366	0.0545461	-1.57803
249	C_0206	γ-Glu-Tyr	94340	HMDB0011741	311.122	10.3379	0.579852	0.356539	1.08177	-0.341394	0.121857	-1.79862
250	C_0169	Isovalerylcarnitine	6426851	HMDB0000688	246.17	7.64797	0.377844	0.755981	1.37132	-1.11883	-0.38291	-1.00341
251	C_0092	N1-Methyl-4-pyridone-5-carboxamide	440810	HMDB0004194	153.066	14.2526	0.427405	0.276387	1.63032	-1.12303	-0.395253	-0.815829
252	C_0142	O-Acetylcarnitine	439756	HMDB0000201	204.123	7.15057	-0.090012	0.377705	1.76889	-1.00358	-0.244817	-0.808188
253	C_0189	γ-Glu-Met	7009567	HMDB0034367	279.102	10.1343	0.229515	0.407177	1.29423	-1.54372	0.375805	-0.763008
254	C_0004	XC0001			72.0808	5.10516	-0.594668	0.449087	1.53808	-1.03183	0.508606	-0.869276
255	C_0002	Urea	1176	HMDB0000294	61.0398	16.1991	-0.667948	0.469311	1.58635	-0.995332	0.415943	-0.808324
256	A_0017	Isethionic acid	7866	HMDB0003903	124.991	9.27108	-0.321123	-0.00859797	1.80323	-1.13605	0.217044	-0.554501
257	A_0057	Quinic acid	6508	HMDB0003072	191.056	6.87288	0.0754253	-0.192099	1.8803	-0.841222	-0.0811785	-0.841222
258	C_0154	Carnosine	439224	HMDB0000033	227.115	5.3937	-0.2785	-0.306277	2.02978	-0.517633	-0.390688	-0.536685
259	C_0040	Anserine_divalent	112072	HMDB0000194	121.069	5.45103	-0.449954	-0.233368	2.0267	-0.458925	-0.312155	-0.572296
260	A_0073	Nalidixic acid	4421		231.078	6.59828	-0.408248	-0.408248	2.04124	-0.408248	-0.408248	-0.408248
261	A_0035	3-(4-Hydroxyphenyl)propionic acid 2-(4-Hydroxyphenyl)propionic acid 3-(3-Hydroxyphenyl)propionic acid	10394 102526 91	HMDB0002199 HMDB0041683 HMDB0000375	165.055	6.95634	-0.408248	-0.408248	2.04124	-0.408248	-0.408248	-0.408248
262	C_0074	1-Methyl-4-imidazoleacetic acid	75810	HMDB0002820	141.066	6.54589	-0.200864	0.0960456	1.95239	-0.635129	-0.595794	-0.616646
263	C_0076	Ectoine	126041		143.081	7.43429	-0.132767	0.256778	1.87942	-0.823644	-0.660109	-0.519682
264	C_0069	Trigonelline	5570	HMDB0000875	138.055	8.27102	-0.515061	0.261899	1.92971	-0.614715	-0.549608	-0.512229
265	C_0165	Homocarnosine	10243361	HMDB0000745	241.131	5.44821	-0.51789	0.0919883	1.97957	-0.51789	-0.51789	-0.51789
266	A_0049	Hippuric acid	464	HMDB0000714	178.051	7.0235	-0.547306	0.159513	1.9492	-0.714208	-0.481425	-0.36577
267	C_0049	Imidazole-4-acetic acid	96215	HMDB0002024	127.05	6.38869	-0.419136	0.173334	1.93956	-0.615812	-0.72897	-0.348973
268	A_0076	XA0035			254.981	10.6348	-0.303805	-0.0142477	1.90277	-0.540241	-0.996389	-0.0480881
269	A_0038	Uric acid	1175	HMDB0000289	167.021	7.36381	-0.532249	-0.0246758	1.93094	-0.00476621	-0.842905	-0.526349
270	C_0075	1H-Imidazole-4-propionic acid	10105257		141.067	6.44645	-0.540622	0.519292	1.71855	-0.173432	-1.14504	-0.378749
271	C_0006	Trimethylamine N-oxide	1145	HMDB0000925	76.0757	5.29197	-0.392494	0.769122	1.65347	-0.369542	-0.779618	-0.880942
272	C_0078	4-Guanidinobutyric acid	500	HMDB0003464	146.093	6.58288	-0.46652	0.652873	1.75775	-0.636123	-0.597563	-0.710418
273	A_0066	3-Indoxylsulfuric acid	10258	HMDB0000682	212.002	7.84725	-0.61325	0.592195	1.79242	-0.65348	-0.624441	-0.493447
274	A_0064	Indole-3-lactic acid 5-Methoxyindoleacetic acid	676157 18986	HMDB0000671 HMDB0004096	204.066	6.71468	-0.765012	0.578369	1.70577	-0.765012	-0.765012	0.0108989
275	C_0053	Pipecolic acid	439227	HMDB0000070,HMDB0000716,HMDB0005960	130.086	8.09353	-0.422457	0.49894	1.66045	-1.02303	-0.863936	0.150038
276	C_0102	7-Methylguanine	11361	HMDB0000897	166.073	6.5503	-0.405558	0.905431	1.07064	-1.10764	-1.10764	0.644762
277	A_0082	2,3-Diphosphoglyceric acid	186004	HMDB0001294	264.952	13.4143	-1.03771	0.574183	1.29898	-0.564113	-1.01632	0.744979
278	A_0037	Phosphoenolpyruvic acid	1005	HMDB0000263	166.975	14.6649	-1.50378	0.229839	1.28877	-0.35812	-0.475537	0.81883
279	A_0051	3-Phosphoglyceric acid	439183	HMDB0000807	184.985	13.9654	-0.913899	-0.251676	1.60021	-0.515573	-0.756926	0.837859
280	A_0050	2-Phosphoglyceric acid	439278	HMDB0003391	184.985	13.7001	-0.497547	-0.901224	1.27745	-0.322303	-0.804366	1.24799
281	A_0123	NAD+	5893	HMDB0000902	662.102	5.56141	-0.201285	-0.670718	1.45458	-1.08798	-0.482959	0.988367
282	C_0147	Propionylcarnitine XC0061	188824 0	HMDB0000824	218.139	7.36506	0.167258	0.0662586	1.36139	-1.67648	-0.346725	0.428294
283	C_0025	Histamine	774	HMDB0000870	112.087	3.86021	-0.398306	0.558891	1.19579	-1.71327	0.402166	-0.0452723
284	C_0046	1-Methylhistamine	3614	HMDB0000898	126.103	3.97305	-0.523923	0.653881	1.13555	-1.69257	0.375503	0.0515633
285	C_0065	Asp	424	HMDB0000191,HMDB0006483	134.045	9.14173	0.0169005	0.360094	0.141639	-1.95007	0.822298	0.609137
286	A_0111	FMN	643976	HMDB0001520	455.099	6.93794	0.692495	0.635792	0.455474	-1.97223	0.0685366	0.11993
287	C_0175	XC0089			255.098	7.51113	0.998967	0.107841	0.177439	-1.74848	-0.397958	0.862196
288	C_0134	Homocitrulline	65072	HMDB0000679	190.119	8.7905	0.584689	0.87763	-0.0323184	-1.51919	-0.842808	0.931992
289	C_0181	γ-Glu-Asp	161197	HMDB0030419	263.088	10.212	0.578327	0.944055	-0.814657	-1.53709	-0.0347849	0.864155
290	C_0149	γ-Glu-Ala	440103	HMDB0006248	219.098	9.6482	0.655907	1.45468	-0.27664	-1.19864	-0.92536	0.290061
291	C_0164	Cystine	595	HMDB0000192	241.031	8.68513	0.125397	1.68497	0.26636	-1.11553	-0.909452	-0.0517466
292	C_0186	γ-Glu-Glu	92865	HMDB0011737	277.103	10.2489	0.667744	1.74416	-0.502265	-0.664042	-0.769498	-0.476101
293	C_0029	3-Amino-2-piperidone	5200225	HMDB0000323	115.087	6.06421	1.15761	1.41576	-0.643343	-0.643343	-0.643343	-0.643343
294	C_0023	Hypotaurine	107812	HMDB0000965	110.027	13.7798	1.16698	1.10524	0.116966	-0.430985	-0.591857	-1.36634
295	C_0121	S-Carboxymethylcysteine	193653		180.031	10.1621	1.51221	0.647754	0.320163	-0.52104	-0.997144	-0.961946
296	C_0137	N-Acetylhistidine	75619		198.088	7.73672	1.23821	0.646269	0.609508	-0.202731	-1.22198	-1.06927
297	A_0006	Isovaleric acid DL-2-Methylbutyric Acid Valeric acid	10430 8314 7991	HMDB0000718 HMDB0002176 HMDB0000892	101.06	7.65077	0.712286	0.595388	1.16691	-0.124727	-1.17493	-1.17493
298	C_0157	Butyrylcarnitine	439829	HMDB0002013	232.154	7.5531	0.891746	0.405625	1.32326	-0.873544	-0.873544	-0.873544
299	C_0073	Urocanic acid	736715	HMDB0000301	139.05	6.58643	1.19747	0.535458	0.943877	-0.89227	-0.89227	-0.89227
300	C_0080	Spermidine	1102	HMDB0001257	146.165	3.6604	1.25615	0.570717	0.610186	-1.13682	-0.108635	-1.19159
301	C_0111	XC0040			174.086	9.45694	0.939529	0.309903	1.16214	-1.15317	-0.105227	-1.15317
302	C_0126	Adrenaline	5816	HMDB0000068	184.098	7.36262	1.55313	-0.635075	0.987172	-0.635075	-0.635075	-0.635075
303	A_0016	β-Hydroxyisovaleric acid	69362	HMDB0000754	117.057	7.56091	1.56801	0.143639	0.500941	-1.0394	-1.08721	-0.0859721
304	C_0112	N5-Ethylglutamine	439378	HMDB0034365	175.108	8.93654	1.19712	0.995979	0.309318	-1.01061	-1.16134	-0.330467
305	C_0098	N6-Methyllysine	164795	HMDB0002038	161.129	5.66744	0.951357	0.727143	0.749793	-0.672777	-1.58855	-0.166967
306	A_0015	Succinic acid	1110	HMDB0000254	117.019	14.6056	1.10759	0.691971	0.834424	-0.984378	-1.19125	-0.458359
307	C_0195	Argininosuccinic acid	16950	HMDB0000052	291.13	7.47415	0.8192	0.871673	0.927001	-1.33371	-0.872789	-0.411378
308	A_0080	myo-Inositol 1-phosphate myo-Inositol 3-phosphate	107737 440194	HMDB0000213 HMDB0006814	259.023	8.38267	0.615243	0.848684	1.00873	-1.26084	-1.13492	-0.0768909
309	A_0011	Fumaric acid	444972	HMDB0000134	115.004	16.4453	0.790635	0.665961	0.816788	-1.23793	-1.29093	0.25548
310	A_0021	Malic acid	525	HMDB0000156,HMDB0000744	133.014	14.7966	0.744063	0.541183	0.914364	-1.02596	-1.47455	0.300898
311	A_0005	Lactic acid	612	HMDB0000190,HMDB0001311	89.0243	8.75812	0.674875	0.625746	0.849422	-0.946262	-1.5536	0.349821
312	C_0150	XC0065			221.093	10.2367	0.455743	0.61964	0.858389	-1.28033	-1.28033	0.626896
IDは測定モードの頭文字と通し番号からなり、Cはカチオンモード、Aはアニオンモードを示す。
† 検出ピークのm/zとMTからHMTデータベースに照合し得られた候補化合物
§ 検出ピークのRelative areaを標準化した値。距離の算出を行うため、オリジナルデータのNDにはeps (2-52)を代用している。
HeatMap（図2）とサンプル、ピークの順列を等しくしている。
